# Supplementary material for: TP53 gain-of-function mutations promote osimertinib resistance via TNF-α–NF-κB signaling in EGFR-mutated lung cancer
Source: PubMed Central journal article supplement (PMC10908812; doi:10.1038/s41698-024-00557-2), 2024-03-02
Supplement: 41698_2024_557_MOESM1_ESM.pdf [file 41698_2024_557_MOESM1_ESM.pdf]

Supplemental Fig. 1

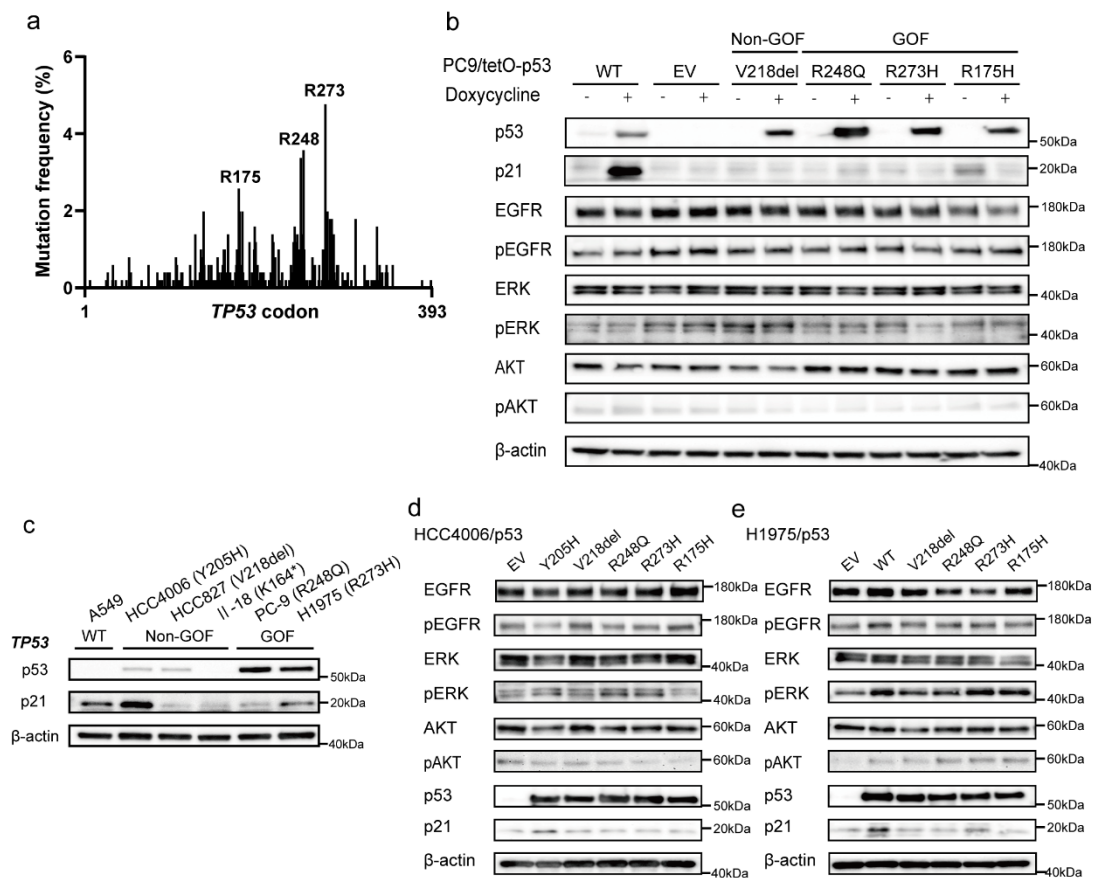

1  
 2 **Supplementary Fig. 1 TP53 mutation in lung cancer.** **a** Frequency of *TP53* mutations  
 3 at each codon of the gene in patients with advanced NSCLC positive for both *EGFR*  
 4 activating mutations (exon-19 deletions or L858R point mutation) and *TP53* mutations  
 5 ( $n = 504$ ) as determined from data of the MSK-MET study accessed via the cBioPortal  
 6 database. **b** Immunoblot analysis of p53 and p21 expression as well as of *EGFR*  
 7 signaling in PC9/tetO-p53<sup>EV</sup>, PC9/tetO-p53<sup>WT</sup>, and PC9/tetO-p53<sup>MUT</sup> cells incubated in  
 8 the absence or presence of doxycycline (1 μg/mL) for 24 h. *TP53* mutant status is  
 9 classified as non-GOF or GOF. **c** Immunoblot analysis of p53 and p21 in various human  
 10 NSCLC cell lines classified according to *TP53* status. **d**, **e** Immunoblot analysis of  
 11 *EGFR* signaling as well as of p53 and p21 in HCC4006/p53<sup>EV</sup> and HCC4006/p53<sup>MUT</sup>  
 12 cells (**d**) and in H1975/p53<sup>EV</sup>, H1975/p53<sup>WT</sup>, and H1975/p53<sup>MUT</sup> cells (**e**).  
 13  
 14

Supplemental Fig. 2

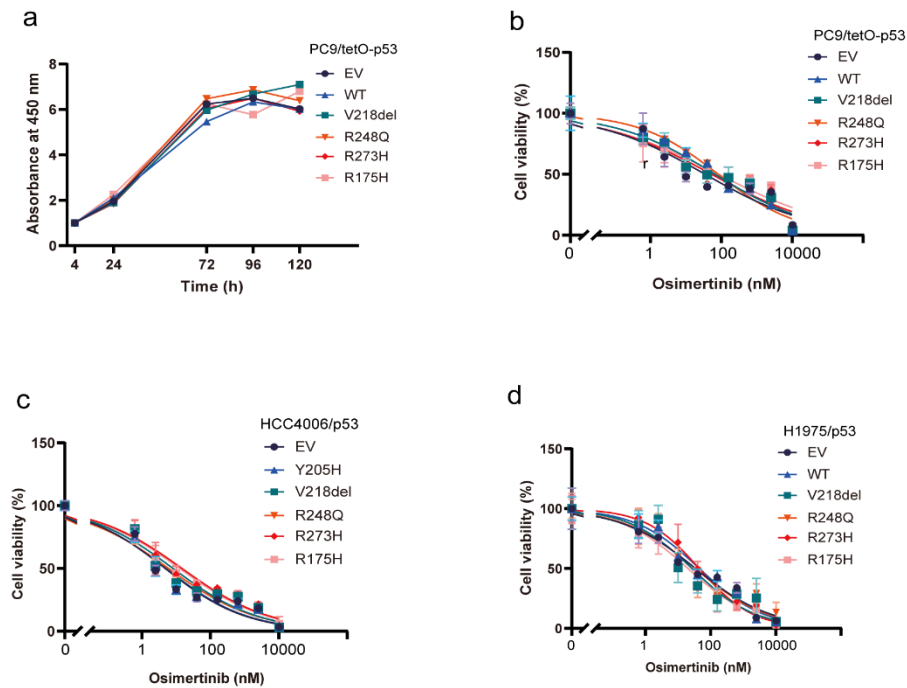

1  
2 **Supplementary Fig. 2** *TP53* status does not affect osimertinib sensitivity of *EGFR*-  
3 mutant NSCLC cells. **a** Cell proliferation curves for PC9/tetO-p53<sup>EV</sup>, PC9/tetO-p53<sup>WT</sup>,  
4 and PC9/tetO-p53<sup>MUT</sup> cells measured with a colorimetric assay. **b–d** Viability of  
5 PC9/tetO-p53<sup>EV</sup>, PC9/tetO-p53<sup>WT</sup>, and PC9/tetO-p53<sup>MUT</sup> cells (**b**), HCC4006/p53<sup>EV</sup> and  
6 HCC4006/p53<sup>MUT</sup> cells (**c**), and H1975/p53<sup>EV</sup>, H1975/p53<sup>WT</sup>, and H1975/p53<sup>MUT</sup> cells  
7 (**d**) treated with the indicated concentrations of osimertinib for 72 h as evaluated with a  
8 colorimetric assay. In both **a** and **b**, the cells were exposed to doxycycline (1 µg/mL) for  
9 24 h before and during the experimental incubation. All data are means ± SEM for  
10 triplicates from one experiment in each case and are representative of three independent  
11 experiments.  
12  
13

Supplemental Fig. 3

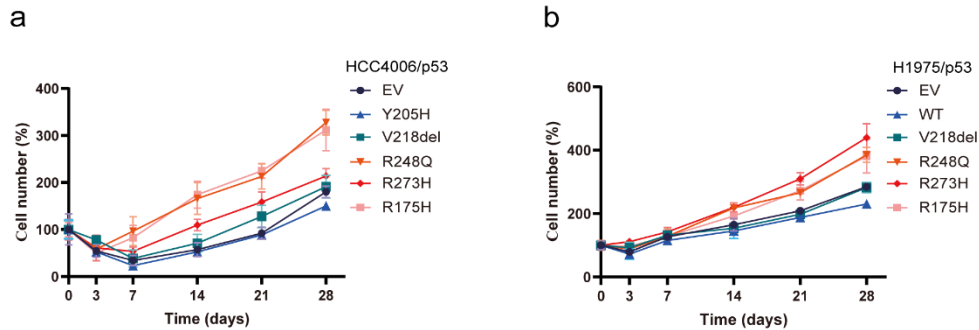

1  
2  
3  
4  
5  
6  
7  
8  
9

**Supplementary Fig. 3 *TP53*-GOF mutation promotes the early development of osimertinib resistance in HCC4006 and H1975 cells.** Time courses of HCC4006/p53<sup>EV</sup> and HCC4006/p53<sup>MUT</sup> (a) as well as H1975/p53<sup>EV</sup>, H1975/p53<sup>WT</sup>, and H1975/p53<sup>MUT</sup> (b) cell number during treatment with 600 nM osimertinib (a) or 1  $\mu$ M osimertinib (b) for up to 28 days are shown. Data are means  $\pm$  SEM for triplicates from one experiment in each case and are representative of three independent experiments.

Supplemental Fig. 4

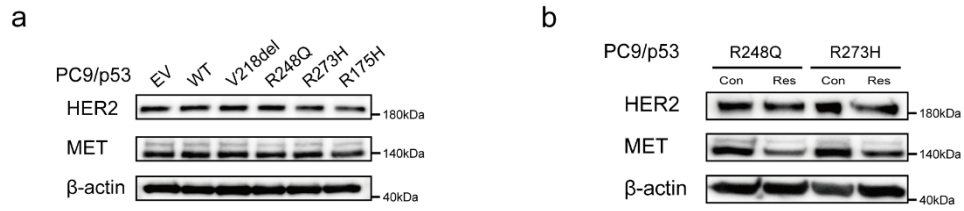

1  
2 **Supplementary Fig. 4 Immunoblot analysis of HER2 and MET.** PC9/p53<sup>EV</sup>,  
3 PC9/p53<sup>WT</sup>, and PC9/p53<sup>MUT</sup> cells under basal conditions (a) as well as PC9/p53<sup>R248Q</sup>  
4 and PC9/p53<sup>R273H</sup> cells either not exposed to osimertinib (Con) or with acquired  
5 resistance to osimertinib induced by long-term exposure to the drug (Res) (b) were  
6 subjected to immunoblot analysis of HER2 and MET.  
7  
8

Supplemental Fig. 5

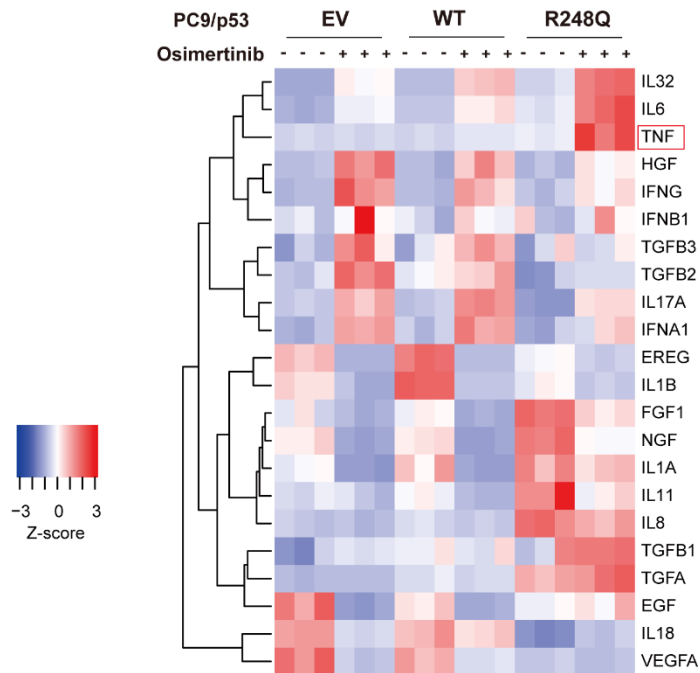

1  
2 **Supplementary Fig. 5 Heat map for hierarchical clustering of cytokine gene**  
3 **expression.** PC9/p53<sup>EV</sup>, PC9/p53<sup>WT</sup>, and PC9/p53<sup>R248Q</sup> cells were incubated in the  
4 absence or presence of 600 nM osimertinib for 24 h before RT-qPCR analysis of mRNA  
5 abundance for various cytokines implicated in tumor progression. The heat map shows  
6 the z-score according to the indicated color scale. Data are shown for triplicates from  
7 one experiment and are representative of two independent experiments.

8  
9

Supplemental Fig. 6

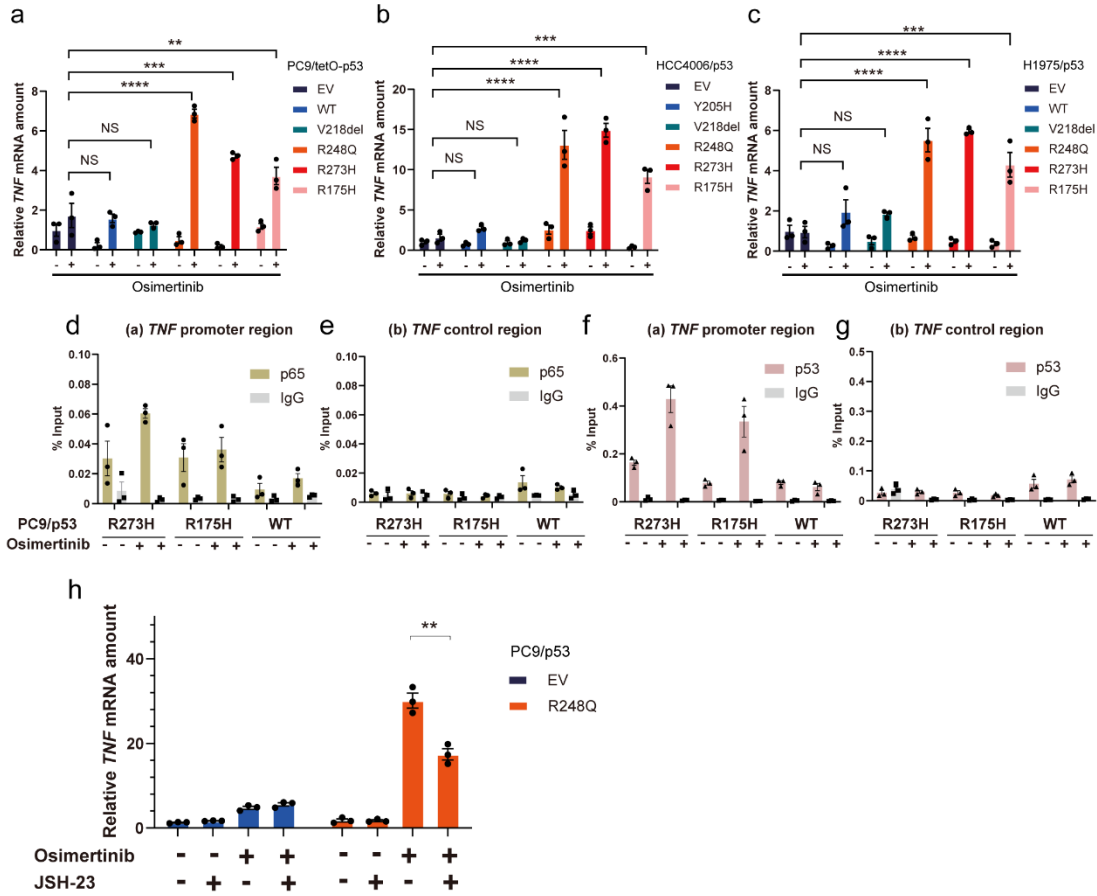

1  
2 **Supplementary Fig. 6 TP53-GOF mutation promotes *TNF* expression in**  
3 **osimertinib-treated cells in a manner dependent on p53-p65 interaction. a–c**  
4 PC9/tetO-p53<sup>EV</sup>, PC9/tetO-p53<sup>WT</sup>, and PC9/tetO-p53<sup>MUT</sup> cells (a), HCC4006/p53<sup>EV</sup> and  
5 HCC4006/p53<sup>MUT</sup> cells (b), and H1975/p53<sup>EV</sup>, H1975/p53<sup>WT</sup>, and H1975/p53<sup>MUT</sup> cells  
6 (c) were incubated in the absence or presence of 600 nM osimertinib for 24 h before RT-  
7 qPCR analysis of *TNF* mRNA abundance. **d–g** Percentage of ChIP-qPCR amplicons  
8 derived from the promoter (d, f) or control (e, g) regions of *TNF* that were  
9 immunoprecipitated with antibodies to p65 (d, e) or to p53 (f, g), or with control IgG,  
10 from PC9/p53<sup>WT</sup>, PC9/p53<sup>R273H</sup>, or PC9/p53<sup>R175H</sup> cells incubated with or without 600  
11 nM osimertinib for 24 h. ChIP-qPCR primers were designed to amplify promoter (a) or  
12 control (b) regions of the *TNF* gene locus shown in Figure 4a. **h** PC9/p53<sup>EV</sup> and  
13 PC9/p53<sup>R248Q</sup> cells were incubated in the absence or presence of 600 nM osimertinib  
14 and 10  $\mu$ M JSH-23 for 24 h before RT-qPCR analysis of *TNF* mRNA abundance. All  
15 data are means  $\pm$  SEM of triplicates from one experiment in each case and are  
16 representative of three independent experiments. \*\* $P < 0.01$ , \*\*\* $P < 0.001$ , \*\*\*\* $P <$   
17 0.0001, NS (one-way ANOVA followed by Tukey's test).

Supplemental Fig. 7

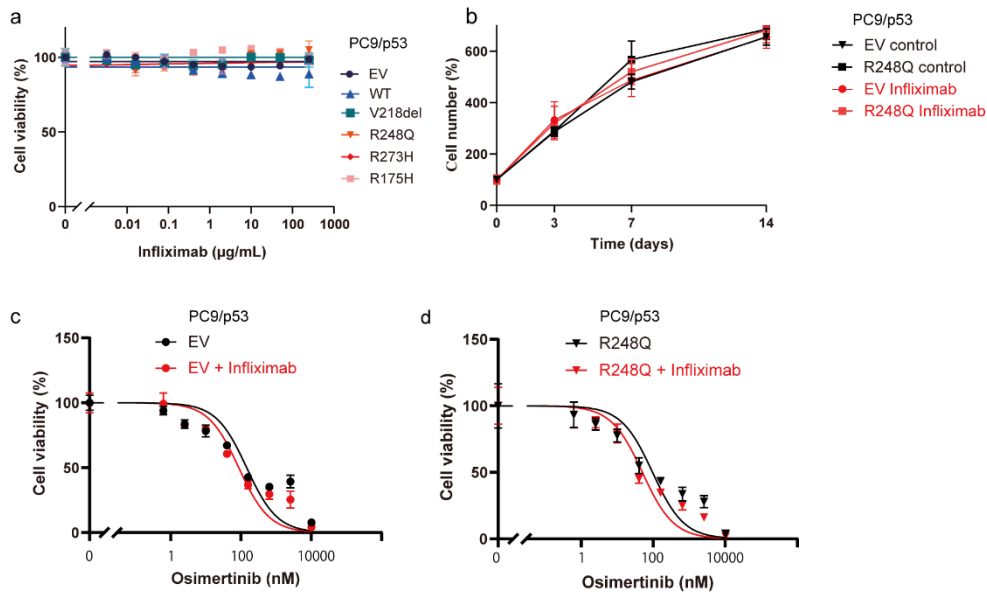

1  
 2 **Supplementary Fig. 7 TP53 status does not affect the sensitivity of EGFR-mutant**  
 3 **NSCLC cells to infliximab.** **a** Viability of PC9/p53<sup>EV</sup>, PC9/p53<sup>WT</sup>, and PC9/p53<sup>MUT</sup>  
 4 cells treated with the indicated concentrations of infliximab for 72 h as evaluated by a  
 5 colorimetric assay. **b** Percentage cell number for PC9/p53<sup>EV</sup> and PC9/p53<sup>R248Q</sup> cells  
 6 treated with DMSO as a control or infliximab (1  $\mu\text{g/mL}$ ) for the indicated times. **d**  
 7 Viability of PC9/p53<sup>EV</sup> (**c**) and PC9/p53<sup>R248Q</sup> (**d**) cells treated with the indicated  
 8 concentrations of osimertinib in the absence or presence of infliximab (1  $\mu\text{g/mL}$ ) for 72  
 9 h. All data are means  $\pm$  SEM of triplicates from one experiment in each case and are  
 10 representative of three (**a**, **c**, **d**) or two (**b**) independent experiments.  
 11  
 12

Supplemental Fig. 8

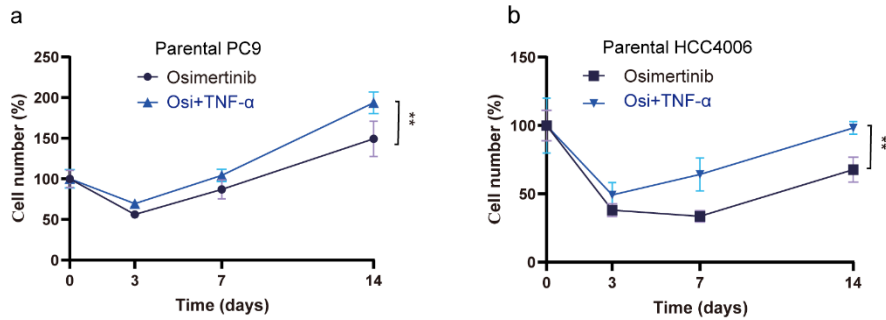

1  
2  
3  
4  
5  
6  
7  
8  
9

**Supplementary Fig. 8 TNF- $\alpha$  promotes osimertinib resistance in parental cell lines.** Percentage cell number is shown for parental PC9 (a) and parental HCC4006 (b) cells treated for the indicated times with 1  $\mu$ M or 600 nM osimertinib (Osi), respectively, in the absence or presence of TNF- $\alpha$  (10 pg/mL). Data are means  $\pm$  SEM of triplicates from one experiment in each case and are representative of two independent experiments. \*\* $P < 0.01$  (one-way ANOVA followed by Tukey's test).



Supplemental Fig. 9

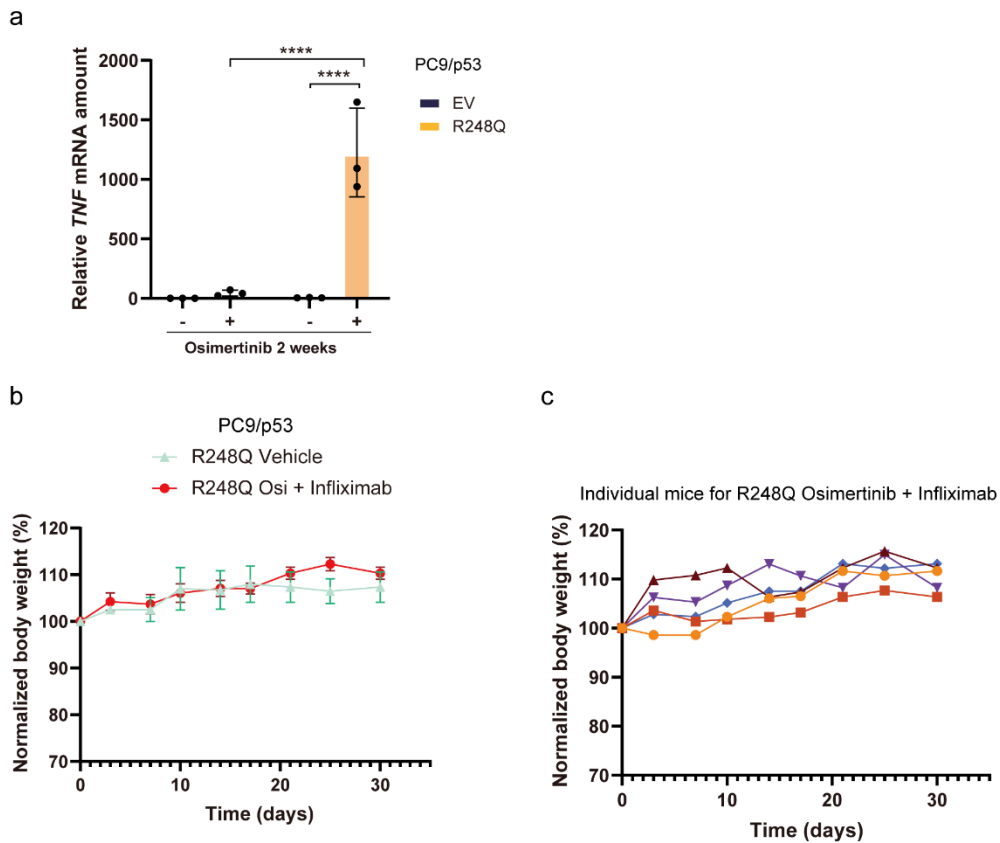

1  
2 **Supplementary Fig. 9 Effects of osimertinib on *TNF* expression and of osimertinib**  
3 **plus infliximab on body weight in a xenograft mouse model. a** RT-qPCR analysis of  
4 *TNF* mRNA abundance in tumors formed by PC9/p53<sup>EV</sup> or PC9/p53<sup>R248Q</sup> cells in nude  
5 mice and treated with vehicle or osimertinib for 14 days. Data are means ± SEM ( $n = 3$   
6 mice per group). \*\*\*\* $P < 0.0001$ , (one-way ANOVA followed by Tukey's test). **b** Time  
7 course of body weight for mice during treatment with vehicle or with osimertinib plus  
8 infliximab in Figure 7c. Data are means ± SEM ( $n = 5$  mice per group). **c** Time course  
9 of body weight for each of the five mice treated with osimertinib plus infliximab in  
10 Figure 7c.  
11

Supplemental Fig. 10

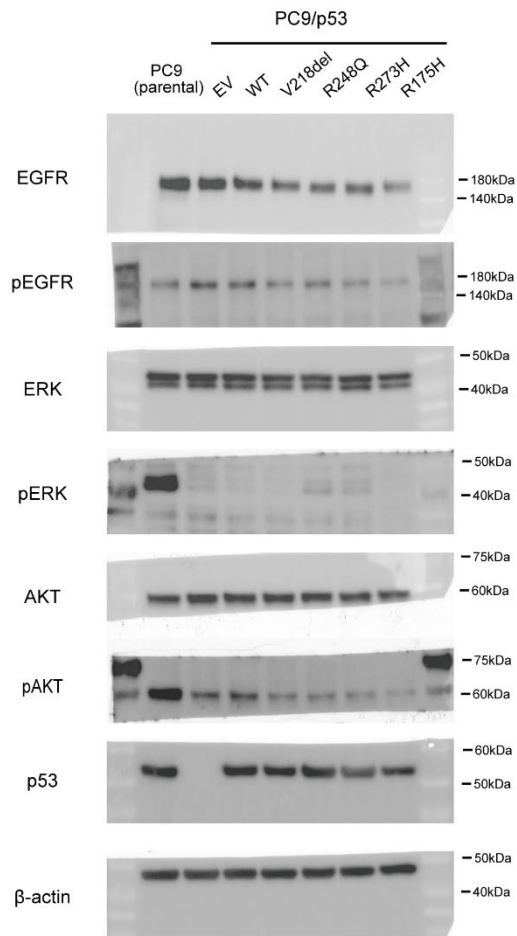

1  
2 **Supplementary Fig. 10** Uncropped scans of blots included in main Figure 1a.  
3  
4

1 **Supplementary Table 1.** *TP53* and *EGFR* status of cell lines.

2

| Cell line | <i>TP53</i> status | <i>EGFR</i> status |
|-----------|--------------------|--------------------|
| A549      | WT                 | WT                 |
| HCC4006   | Y205H (non-GOF)    | Exon-19 deletion   |
| HCC827    | V218del (non-GOF)  | Exon-19 deletion   |
| II -18    | K164* (non-GOF)    | L858R              |
| PC-9      | R248Q (GOF)        | Exon-19 deletion   |
| H1975     | R273H (GOF)        | L858R + T790M      |

3

4

1 **Supplementary Table 2.** List of the 111 genes shared between set A and set B in Figure  
 2 3a and their log<sub>2</sub>[fold change (FC)] values.  
 3

| Gene symbol    | Set A_log <sub>2</sub> [FC] | Set B_log <sub>2</sub> [FC] | Gene symbol | Set A_log <sub>2</sub> [FC] | Set B_log <sub>2</sub> [FC] | Gene symbol    | Set A_log <sub>2</sub> [FC] | Set B_log <sub>2</sub> [FC] |
|----------------|-----------------------------|-----------------------------|-------------|-----------------------------|-----------------------------|----------------|-----------------------------|-----------------------------|
| RTP4           | 7.149                       | 1.397                       | COMMD3-BM11 | 2.064                       | 1.391                       | SLC52A1        | 1.424                       | 1.892                       |
| LGR5           | 6.677                       | 1.372                       | DUSP15      | 2.063                       | 2.498                       | LOC554249      | 1.413                       | 6.130                       |
| CNTF           | 6.548                       | 1.910                       | PSG5        | 2.063                       | 1.333                       | MIAT           | 1.392                       | 1.149                       |
| DYX1C1-CCPG1   | 5.969                       | 5.773                       | DUSP13      | 2.046                       | 3.059                       | KIF17          | 1.381                       | 1.175                       |
| OTOF           | 5.865                       | 2.443                       | ADAMTSL2    | 2.042                       | 2.206                       | CERS4          | 1.364                       | 1.998                       |
| TMEM189-UBE2V1 | 5.494                       | 5.299                       | MX2         | 2.010                       | 1.159                       | ARL10          | 1.360                       | 1.053                       |
| SLCO2B1        | 5.494                       | 2.926                       | MGC50722    | 2.004                       | 2.012                       | PRH1-PRR4      | 1.344                       | 2.719                       |
| ST6GALNAC5     | 5.180                       | 2.612                       | C8orf46     | 1.978                       | 2.289                       | C4orf26        | 1.343                       | 1.533                       |
| OLR1           | 3.897                       | 1.017                       | LRRC43      | 1.871                       | 1.492                       | SYNPO2L        | 1.342                       | 2.569                       |
| PSG8           | 3.826                       | 1.648                       | TRIM74      | 1.814                       | 2.199                       | ADAMTS14       | 1.328                       | 1.519                       |
| FLG            | 3.274                       | 5.298                       | KRT34       | 1.775                       | 1.046                       | SEPT5-GP1BB    | 1.307                       | 6.349                       |
| CLCNKB         | 3.269                       | 2.903                       | FAM225B     | 1.770                       | 2.002                       | CSF1R          | 1.291                       | 2.032                       |
| SEPP1          | 3.225                       | 1.890                       | DDO         | 1.769                       | 1.542                       | FCGRT          | 1.290                       | 1.955                       |
| TMEM130        | 3.197                       | 1.098                       | HCST        | 1.757                       | 1.559                       | C5AR1          | 1.282                       | 1.035                       |
| CSDC2          | 3.042                       | 1.187                       | TMPRSS3     | 1.750                       | 1.148                       | LEKR1          | 1.261                       | 1.168                       |
| NR4A3          | 3.014                       | 2.642                       | GAL3ST4     | 1.748                       | 1.247                       | FMO5           | 1.255                       | 1.949                       |
| CD72           | 2.960                       | 4.986                       | FRMPD3      | 1.729                       | 1.968                       | GLT8D2         | 1.248                       | 2.667                       |
| TSPY26P        | 2.957                       | 2.614                       | RNF150      | 1.690                       | 1.964                       | KLK11          | 1.246                       | 1.548                       |
| EFS            | 2.907                       | 3.401                       | KCNC3       | 1.664                       | 2.585                       | C15orf38-AP3S2 | 1.242                       | 1.198                       |
| PDE6G          | 2.817                       | 1.497                       | ADAP2       | 1.657                       | 2.802                       | FOLR1          | 1.234                       | 3.023                       |
| CAPN13         | 2.713                       | 1.767                       | SYNGR3      | 1.603                       | 1.168                       | PON3           | 1.219                       | 1.903                       |
| KCNH3          | 2.693                       | 3.179                       | PIFO        | 1.596                       | 1.775                       | RCAN2          | 1.197                       | 2.172                       |
| SAA1           | 2.615                       | 1.175                       | MAPT        | 1.589                       | 2.445                       | RASA4B         | 1.180                       | 2.144                       |
| IL6            | 2.601                       | 1.223                       | WFDC21P     | 1.589                       | 5.668                       | RASIP1         | 1.143                       | 1.236                       |
| VWA5A          | 2.566                       | 5.432                       | IL32        | 1.575                       | 1.029                       | GPR173         | 1.136                       | 1.448                       |
| CCDC154        | 2.440                       | 2.072                       | SBK2        | 1.566                       | 1.068                       | ERICH5         | 1.106                       | 1.041                       |
| MYOZ1          | 2.341                       | 1.957                       | LDHD        | 1.565                       | 1.972                       | SELM           | 1.092                       | 1.216                       |
| CRYAB          | 2.314                       | 2.492                       | ANKRD34B    | 1.547                       | 1.680                       | PLEKHG4B       | 1.084                       | 1.653                       |
| THEMIS2        | 2.293                       | 1.049                       | GJC3        | 1.542                       | 1.724                       | SERPING1       | 1.078                       | 5.014                       |
| PDGFRB         | 2.287                       | 5.150                       | LIMS2       | 1.527                       | 1.114                       | RBP5           | 1.071                       | 1.343                       |
| NPPB           | 2.219                       | 2.915                       | TNFRSF9     | 1.524                       | 2.710                       | FKBP1B         | 1.062                       | 1.983                       |
| MAGEC2         | 2.172                       | 5.555                       | FCGBP       | 1.502                       | 2.511                       | EDN2           | 1.060                       | 1.402                       |
| SSPO           | 2.140                       | 2.245                       | PDZD7       | 1.489                       | 2.506                       | NPHP3-ACAD11   | 1.047                       | 1.525                       |
| HECW2          | 2.117                       | 1.022                       | NGFR        | 1.465                       | 2.307                       | PROS1          | 1.015                       | 3.361                       |
| LOC728392      | 2.100                       | 3.123                       | STAC2       | 1.462                       | 3.000                       | EFEMP2         | 1.004                       | 1.126                       |
| CSF2RB         | 2.078                       | 1.914                       | HRNR        | 1.459                       | 2.628                       |                |                             |                             |
| ZNRD1-AS1      | 2.073                       | 2.656                       | HMGCLL1     | 1.439                       | 2.036                       |                |                             |                             |
| PDZK1IP1       | 2.071                       | 1.324                       | STON1       | 1.432                       | 2.835                       |                |                             |                             |

4

1 **Supplementary Table 3.** Oligonucleotide sequences for plasmid construction.

2

| Vector  | Forward primer (5'-3')               | Reverse primer (5'-3')                 |
|---------|--------------------------------------|----------------------------------------|
| pQCXIP  | TTGTGAGGCACTGCCCCACCA<br>TGAGCGCTG   | GGCAGTGCCTCACAACCTCCGTCATG<br>TGC      |
| pTetOne | GAGGTGGTCTGGATCTCAGTCT<br>GAGTCAGGCC | CCCTCGTAAAGAATTATGGAGGAGCCG<br>CAGTCAG |

3

4

1 **Supplementary Table 4.** Oligonucleotide sequences for RT-qPCR analysis of gene  
 2 expression.  
 3

| Gene         | Forward primer (5'-3')   | Reverse primer (5'-3')     |
|--------------|--------------------------|----------------------------|
| <i>TNF</i>   | GCCCATGTTGTAGCAAACCC     | GAGGTACAGGCCCTCTGATG       |
| <i>IL6</i>   | ACTCACCTCTTCAGAACGAATTG  | CCATCTTTGGAAGGTTTCAGGTTG   |
| <i>IL32</i>  | GGACGTGGACAGGTGATGTC     | CTGTCTCCAGGTAGCCCTCT       |
| <i>IL11</i>  | AGCGGACAGGGAAGGGTTA      | AGGCGGCAAACACAGTTCAT       |
| <i>NGF</i>   | GAGCGCAGCGAGTTTTGG       | AGTGTGGTTCCGCCTGTATG       |
| <i>IL17A</i> | CACCTTGGAATCTCCACCGC     | GGATCTCTTGCTGGATGGGG       |
| <i>IFNA1</i> | AATACAGCCCTTGTGCCTGG     | AGCAGGGGTGAGAGTCTTTG       |
| <i>IFNB1</i> | AGTAGGCGACACTGTTCGTG     | GCCTCCCATTCAATTGCCAC       |
| <i>IFNG</i>  | GGGTAAGTACTGACTTGAATGTCC | TTTTCGCTTCCCTGTTTTAG       |
| <i>EREG</i>  | TGGACATGAGTCAAACTACT     | GAAGTGTTCCACATCGGACACC     |
| <i>IL8</i>   | ACTGAGAGTGATTGAGAGTGGAC  | AACCCTCTGCACCCAGTTTTTC     |
| <i>TGFB1</i> | GGAAATTGAGGGCTTTCGCC     | CCGGTAGTGAACCCGTTGAT       |
| <i>TGFB2</i> | AAGCTGAAGCTCACCAGTCC     | GCGGGATGGCATTTCGGAG        |
| <i>TGFB3</i> | ATTCGACATGATCCAGGGGC     | CTGGCCGAAGGATCTGGAAG       |
| <i>TGFA</i>  | AGGTCCGAAAACACTGTGAGT    | AGCAAGCGGTTCTTCCCTTC       |
| <i>IL1B</i>  | CCAAACCTCTTCGAGGCACA     | GCTGCTTCAGACACTTGAGC       |
| <i>IL1A</i>  | GCGTTTGAGTCAGCAAAGAAGTC  | GGAGTGGGCCATAGCTTACA       |
| <i>EGF</i>   | CTTGGGAGCCTGAGCAGAAA     | GCACAAGTGTGACTGGAGGT       |
| <i>HGF</i>   | GAATGACACTGATGTTCTTTGG   | GGATACTGAGAATCCCAACGC      |
| <i>FGF1</i>  | AAAGCGTGGGGGAGGTGTAT     | ATTTGGTGTCTGTGAGCCGT       |
| <i>IL18</i>  | CAGATCGCTTCCTCTCGCAA     | CCAGGTTTTTCATCATCTTCAGCTAT |
| <i>VEGFA</i> | TAAGTCCTGGAGCGTTCCT      | ACGCGAGTCTGTGTTTTTGC       |
| <i>GAPDH</i> | GGAGCGAGATCCCTCCAAAAT    | GGCTGTTGTCATACTTCTCATGG    |

4

1 **Supplementary Table 5.** Oligonucleotide sequences for ChIP-qPCR analysis.

2

| <i>TNF</i> region | Forward primer (5'-3') | Reverse primer (5'-3') |
|-------------------|------------------------|------------------------|
| Promoter          | AGGGCCCACTACCGCTTC     | GTGTGCCAACAACCTGCCTTA  |
| Control           | GCCAGGATGTGGAGAGTGAAC  | GTTCAGCCACTGGAGCTGC    |

3

4
